# Supplementary material for: Vaccine-Preventable Infections Among Solid Organ Transplant Recipients in Switzerland
Source: PubMed Central journal article supplement (PMC10148200; doi:10.1001/jamanetworkopen.2023.10687), 2023-04-28
Supplement: jamanetwopen-e2310687-s003.pdf [file jamanetwopen-e2310687-s003.pdf]

## Data Sharing Statement

Walti. Vaccine-Preventable Infections Among Solid Organ Transplant Recipients in Switzerland. *JAMA Netw Open*. Published April 28, 2023.

doi:10.1001/jamanetworkopen.2023.10687

### Data

**Data available:** No

### Additional Information

**Explanation for why data not available:** Data will be shared upon reasonable request to the corresponding author.
